# Supplementary material for: Recombinant Simian Varicella Virus-Simian Immunodeficiency Virus Vaccine Induces T and B Cell Functions and Provides Partial Protection against Repeated Mucosal SIV Challenges in Rhesus Macaques
Source: MDPI journal article supplement (doi:10.3390/v14122819), 2022-12-17
Supplement: s1 [file s1]

**Table S1: Animal group distribution**

| <b>Group</b> | <b>Animal Number</b> | <b>Age (Years)</b> | <b>Body Weight (Kg)</b> |
|--------------|----------------------|--------------------|-------------------------|
| Vaccine      | LK45                 | 5.5                | 4.6                     |
|              | LK50                 | 5.3                | 5.9                     |
|              | LK54                 | 5.0                | 5.7                     |
|              | LK56                 | 4.6                | 5.5                     |
|              | LK57                 | 4.5                | 5.3                     |
|              | LK58                 | 4.4                | 5.2                     |
|              | LK59                 | 4.4                | 6.0                     |
|              | LK60                 | 4.4                | 5.1                     |
| Control      | LK42                 | 6.4                | 5.2                     |
|              | LK46                 | 5.5                | 5.3                     |
|              | LK51                 | 5.2                | 5.9                     |
|              | LK53                 | 5.1                | 5.2                     |
|              | LK55                 | 4.6                | 6.0                     |
|              | LP32                 | 4.6                | 5.0                     |
|              | LP33                 | 5.5                | 5.0                     |

All macaques were MHC typed and negative for Mamu-A\*01, B\*08 and B\*17 alleles.

**Table S2: List of monoclonal antibodies used for T-cell phenotyping and antigen specific cytokine flow cytometry assays**

| <b>Antibody</b>         | <b>Clone</b> | <b>Amount<br/>used (μL)</b> | <b>Source</b>                     |
|-------------------------|--------------|-----------------------------|-----------------------------------|
| Anti-human CD3          | SP34-2       | 5                           | BD Biosciences, CA                |
| Anti-human CD4          | L200         | 3                           | BD Biosciences, CA                |
| Anti-human CD8          | SK1          | 3                           | BD Biosciences, CA                |
| Anti-human CD25         | M-A251       | 5                           | Biolegend, CA                     |
| Anti-human CD28         | CD28.2       | 5                           | BD Biosciences, CA                |
| Anti-human CD38         | OKT10        | 5                           | NHP Reagent Resource Program, NIH |
| Anti-NHP CD45           | D058-1283    | 10                          | BD Biosciences, CA                |
| Anti-human CD69         | FN50         | 5                           | Biolegend, CA                     |
| Anti-human CD95         | DX2          | 5                           | BD Biosciences, CA                |
| Anti-human CD107a       | H4A3         | 20                          | BD Biosciences, CA                |
| Anti-human CD107b       | H4B4         | 5                           | BD Biosciences, CA                |
| Anti-human HLA-DR       | G46-6        | 5                           | BD Biosciences, CA                |
| Anti-human IFN $\gamma$ | B27          | 3                           | Biolegend, CA                     |
| Anti-human IL-2         | JES3-9D7     | 5                           | Biolegend, CA                     |
| Anti-human IL-4         | 8D4-8        | 5                           | BD Biosciences, CA                |
| Anti-human IL-5         | JES1-39D10   | 5                           | Sony Biotech, CA                  |
| Anti-human IL-21        | 3A3-N2       | 5                           | Sony Biotech, CA                  |
| Anti-mouse Ki67         | B56          | 20                          | BD Biosciences, CA                |
| Anti-human TNF $\alpha$ | Mab11        | 5                           | Biolegend, CA                     |

**Table S3: Statistical Analysis of different cell types and tissues in vaccine Group**

| Cell Types/Tissue  | Vaccine timepoint Comparison | Adjusted p value | Mean values $\pm$ Standard Errors (%) |
|--------------------|------------------------------|------------------|---------------------------------------|
| CM CD4+/ PBMC      | pV#2 vs. pV#3                | 0.0007           | 40.9 $\pm$ 2.2 vs. 56.8 $\pm$ 3.8     |
| Naïve CD4+/ LN     | pV#2 vs. pV#5                | 0.025            | 71.0 $\pm$ 3.9 vs. 53.6 $\pm$ 5.4     |
| CM CD4+/ LN        | Pre vs. pV#5                 | 0.045            | 29.1 $\pm$ 3.7 vs. 46.0 $\pm$ 6.0     |
|                    | pV#2 vs. pV#5                | 0.003            | 22.8 $\pm$ 3.3 vs. 46.0 $\pm$ 6.0     |
| EM CD4+/ LN        | Pre vs. pV#2                 | 0.009            | 6.3 $\pm$ 0.8 vs. 3.0 $\pm$ 0.4       |
|                    | Pre vs. pV#3                 | 0.017            | 6.3 $\pm$ 0.8 vs. 3.2 $\pm$ 0.7       |
|                    | Pre vs. pV#5                 | <0.0001          | 6.3 $\pm$ 0.8 vs. 1.2 $\pm$ 0.5       |
|                    | pV#2 vs. pV#4                | 0.009            | 3.0 $\pm$ 0.4 vs. 6.3 $\pm$ 0.9       |
|                    | pV#3 vs. pV#4                | 0.017            | 3.2 $\pm$ 0.7 vs. 6.3 $\pm$ 0.9       |
|                    | pV#4 vs. pV#5                | <0.0001          | 6.3 $\pm$ 0.9 vs. 1.2 $\pm$ 0.5       |
| CD4+/Jej LPL       | Pre vs. SIV+                 | 0.020            | 47.3 $\pm$ 4.5 vs. 25.4 $\pm$ 4.1     |
|                    | pV#2 vs. SIV+                | 0.012            | 53.7 $\pm$ 7.9 vs. 25.4 $\pm$ 4.1     |
|                    | pV#3 vs. SIV+                | <0.0001          | 72.4 $\pm$ 2.8 vs. 25.4 $\pm$ 4.1     |
|                    | pV#5 vs. SIV+                | 0.0004           | 56.3 $\pm$ 6.1 vs. 25.4 $\pm$ 4.1     |
| CD4+/Rectal LPL    | Pre vs. SIV+                 | <0.0001          | 62.9 $\pm$ 3.6 vs. 23.7 $\pm$ 4.5     |
|                    | pV#2 vs. SIV+                | 0.0004           | 53.7 $\pm$ 7.9 vs. 23.7 $\pm$ 4.5     |
|                    | pV#3 vs. SIV+                | <0.0001          | 69.9 $\pm$ 2.5 vs. 23.7 $\pm$ 4.5     |
|                    | pV#4 vs. SIV+                | <0.0001          | 54.3 $\pm$ 2.8 vs. 23.7 $\pm$ 4.5     |
|                    | pV#5 vs. SIV+                | <0.0001          | 57.7 $\pm$ 3.6 vs. 23.7 $\pm$ 4.5     |
| CM CD4+/Jej LPL    | Pre vs. pV#2                 | 0.002            | 61.4 $\pm$ 6.7 vs. 94.3 $\pm$ 0.9     |
|                    | Pre vs. pV#3                 | 0.029            | 61.4 $\pm$ 6.7 vs. 81.6 $\pm$ 3.5     |
|                    | pV#2 vs. pV#5                | 0.010            | 94.3 $\pm$ 0.9 vs. 66.1 $\pm$ 3.9     |
| EM CD4+/Jej LPL    | Pre vs. pV#2                 | 0.001            | 35.8 $\pm$ 6.9 vs. 1.5 $\pm$ 0.5      |
|                    | Pre vs. pV#3                 | 0.026            | 35.8 $\pm$ 6.9 vs. 15.5 $\pm$ 3.0     |
|                    | pV#2 vs. pV#5                | 0.015            | 1.5 $\pm$ 0.5 vs. 28.3 $\pm$ 3.9      |
| CM CD4+/Rectal LPL | Pre vs. pV#2                 | 0.0003           | 76.1 $\pm$ 1.5 vs. 94.3 $\pm$ 0.9     |
|                    | Pre vs. pV#3                 | 0.011            | 76.1 $\pm$ 1.5 vs. 86.9 $\pm$ 3.8     |
|                    | Pre vs. pV#5                 | 0.020            | 76.1 $\pm$ 1.5 vs. 86.2 $\pm$ 1.9     |
| CM CD8+/Jej LPL    | Pre vs. pV#2                 | <0.0001          | 61.3 $\pm$ 2.3 vs. 94.3 $\pm$ 0.6     |
|                    | Pre vs. pV#3                 | <0.0001          | 61.3 $\pm$ 2.3 vs. 89.4 $\pm$ 3.3     |
|                    | Pre vs. pV#5                 | <0.0001          | 61.3 $\pm$ 2.3 vs. 30.6 $\pm$ 5.5     |

|                       |               |         |                           |
|-----------------------|---------------|---------|---------------------------|
|                       | pV#3 vs. pV#4 | <0.0001 | 89.4 ± 3.3 vs. 54.1 ± 2.4 |
|                       | pV#3 vs. pV#5 | <0.0001 | 89.4 ± 3.3 vs. 30.6 ± 5.5 |
|                       | pV#4 vs. pV#5 | 0.0003  | 54.1 ± 2.4 vs. 30.6 ± 5.5 |
| EM CD8+/Jej LPL       | Pre vs. pV#2  | <0.0001 | 36.2 ± 2.8 vs. 3.5 ± 0.5  |
|                       | Pre vs. pV#3  | 0.0001  | 36.2 ± 2.8 vs. 9.6 ± 3.2  |
|                       | Pre vs. pV#5  | <0.0001 | 36.2 ± 2.8 vs. 67.7 ± 5.9 |
|                       | pV#3 vs. pV#4 | <0.0001 | 9.6 ± 3.2 vs. 43.5 ± 2.2  |
|                       | pV#3 vs. pV#5 | <0.0001 | 9.6 ± 3.2 vs. 67.7 ± 5.9  |
|                       | pV#4 vs. pV#5 | 0.0004  | 43.5 ± 2.2 vs. 67.7 ± 5.9 |
| CM CD8+/Rectal LPL    | Pre vs. pV#2  | 0.0001  | 57.9 ± 3.5 vs. 94.7 ± 0.5 |
|                       | Pre vs. pV#3  | 0.003   | 57.9 ± 3.5 vs. 81.4 ± 5.2 |
|                       | pV#3 vs. pV#4 | 0.010   | 81.4 ± 5.2 vs. 60.6 ± 5.1 |
|                       | pV#3 vs. pV#5 | <0.0001 | 81.4 ± 5.2 vs. 42.6 ± 3.2 |
|                       | pV#4 vs. pV#5 | 0.034   | 60.6 ± 5.1 vs. 42.6 ± 3.2 |
| EM CD8+/Rectal LPL    | Pre vs. pV#2  | 0.0002  | 39.0 ± 3.6 vs. 2.8 ± 0.6  |
|                       | Pre vs. pV#3  | 0.007   | 39.0 ± 3.6 vs. 17.1 ± 5.2 |
|                       | pV#3 vs. pV#4 | 0.018   | 17.1 ± 5.2 vs. 36.8 ± 5.1 |
|                       | pV#3 vs. pV#5 | <0.0001 | 17.1 ± 5.2 vs. 55.3 ± 3.4 |
|                       | pV#4 vs. pV#5 | 0.029   | 36.8 ± 5.1 vs. 55.3 ± 3.4 |
| CD4+CD38+/Jej LPL     | Pre vs. pV#2  | 0.005   | 32.6 ± 4.1 vs. 11.9 ± 1.9 |
|                       | Pre vs. pV#3  | <0.0001 | 32.6 ± 4.1 vs. 2.3 ± 0.9  |
|                       | Pre vs. pV#5  | 0.015   | 32.6 ± 4.1 vs. 17.4 ± 2.9 |
|                       | pV#3 vs. pV#4 | 0.007   | 2.3 ± 0.9 vs. 19.5 ± 5.1  |
|                       | pV#4 vs. pV#5 | 0.012   | 19.5 ± 5.1 vs. 17.4 ± 2.9 |
| CD4+CD38+/Rectal LPL  | pV#3 vs. pV#4 | 0.019   | 1.1 ± 0.5 vs. 13.1 ± 3.9  |
|                       | pV#3 vs. pV#5 | 0.019   | 1.1 ± 0.5 vs. 12.7 ± 2.4  |
| CD8+CD38+/Jej LPL     | Pre vs. pV#3  | <0.0001 | 19.6 ± 2.4 vs. 1.4 ± 0.5  |
|                       | pV#2 vs. pV#3 | 0.035   | 13.3 ± 3.4 vs. 1.4 ± 0.5  |
|                       | pV#3 vs. pV#4 | <0.0001 | 1.4 ± 0.5 vs. 21.4 ± 3.6  |
|                       | pV#3 vs. pV#5 | 0.003   | 1.4 ± 0.5 vs. 14.2 ± 2.4  |
| CD8+CD38+/Rectal LPL  | Pre vs. pV#3  | 0.009   | 16.4 ± 3.8 vs. 1.4 ± 0.7  |
| CD4+HLADR+/Jej LPL    | Pre vs. pV#3  | 0.003   | 9.1 ± 0.6 vs. 3.6 ± 0.5   |
| CD8+HLADR+/Rectal LPL | Pre vs. pV#4  | 0.024   | 5.2 ± 2.4 vs. 12.8 ± 1.3  |
| CD4+CD69+/Jej LPL     | Pre vs. pV#2  | <0.0001 | 64.8 ± 4.3 vs. 2.7 ± 0.9  |
|                       | Pre vs. pV#3  | <0.0001 | 64.8 ± 4.3 vs. 30.6 ± 4.1 |

|                      |              |         |                           |
|----------------------|--------------|---------|---------------------------|
|                      | Pre vs. pV#5 | <0.0001 | 64.8 ± 4.3 vs. 31.8 ± 1.8 |
| CD4+CD69+/Rectal LPL | Pre vs. pV#2 | <0.0001 | 43.8 ± 7.2 vs. 3.0 ± 2.0  |
|                      | Pre vs. pV#3 | 0.0007  | 43.8 ± 7.2 vs. 16.6 ± 2.9 |
|                      | Pre vs. pV#5 | 0.006   | 43.8 ± 7.2 vs. 22.4 ± 1.1 |
|                      |              |         |                           |
| CD8+CD69+/Jej LPL    | Pre vs. pV#2 | <0.0001 | 64.2 ± 4.2 vs. 7.8 ± 1.6  |
|                      | Pre vs. pV#3 | <0.0001 | 64.2 ± 4.2 vs. 36.7 ± 4.7 |
|                      | Pre vs. pV#5 | 0.013   | 64.2 ± 4.2 vs. 46.4 ± 2.8 |
|                      |              |         |                           |

**Table S4: SIV-antigen specific cytokine responses in lymph node tissue during pV#3 and pV#4 vaccination phase**

| Macaque | Antigen# | T cells | pV#3     |              |      |      |      |      |              | pV#4     |              |      |      |      |      |              |
|---------|----------|---------|----------|--------------|------|------|------|------|--------------|----------|--------------|------|------|------|------|--------------|
|         |          |         | CD107a/b | IFN $\gamma$ | IL2  | IL4  | IL5  | IL21 | TNF $\alpha$ | CD107a/b | IFN $\gamma$ | IL2  | IL4  | IL5  | IL21 | TNF $\alpha$ |
| LK50    | Gag      | CD4     |          |              | 0.10 | 0.22 |      |      |              |          |              |      |      |      |      |              |
| LK57    | Gag      | CD4     |          | 0.26         |      |      |      |      |              |          |              |      | 3.66 |      |      | 0.11         |
| LK58    | Gag      | CD4     |          |              |      |      |      |      | 0.24         |          |              |      |      |      |      |              |
| LK50    | Gag      | CD8     | 0.34     |              |      |      | 0.24 |      |              |          |              |      |      |      |      |              |
| LK57    | Gag      | CD8     |          |              |      |      |      |      |              | 0.74     | 0.24         |      | 4.11 | 0.10 | 0.09 |              |
| LK58    | Gag      | CD8     |          |              | 0.26 | 0.52 |      |      |              |          |              |      | 0.61 |      |      | 0.24         |
| LK45    | Gag      | CD4     |          |              |      |      |      |      |              |          |              |      | 1.23 |      |      |              |
| LK54    | Gag      | CD4     |          |              |      |      |      |      |              |          | 0.24         |      | 0.63 | 0.24 |      |              |
| LK56    | Gag      | CD4     | 0.24     | 0.54         | 0.32 |      | 0.38 | 0.34 |              |          |              |      | 1.25 |      |      |              |
| LK59    | Gag      | CD4     |          |              |      |      |      |      |              |          |              |      |      |      |      | 0.20         |
| LK60    | Gag      | CD4     |          |              |      | 0.13 |      |      |              |          |              |      |      |      |      |              |
| LK45    | Gag      | CD8     |          |              |      |      |      |      |              |          | 0.10         |      | 2.46 |      |      |              |
| LK54    | Gag      | CD8     |          |              |      |      |      |      |              | 0.15     | 0.36         |      |      | 0.34 | 0.43 | 0.33         |
| LK56    | Gag      | CD8     | 0.22     | 0.22         | 0.22 |      |      | 2.04 |              |          |              |      | 1.86 |      |      |              |
| LK59    | Gag      | CD8     |          |              |      |      |      |      |              |          | 0.09         |      | 1.58 | 0.14 |      |              |
| LK60    | Gag      | CD8     |          |              | 0.31 | 0.10 |      |      |              |          |              |      |      |      |      |              |
| LK50    | Env      | CD4     |          |              | 0.13 | 0.45 |      |      |              |          |              |      |      | 0.24 |      |              |
| LK57    | Env      | CD4     |          | 0.84         | 0.58 |      |      |      |              |          |              |      | 1.85 |      |      |              |
| LK58    | Env      | CD4     | 1.83     | 0.21         |      |      |      |      |              |          |              |      |      |      |      | 0.31         |
| LK50    | Env      | CD8     |          |              |      | 0.45 |      | 0.65 |              |          |              |      |      | 0.21 |      |              |
| LK57    | Env      | CD8     |          | 1.01         | 0.33 |      |      |      |              | 0.71     |              |      |      | 0.14 | 0.08 |              |
| LK58    | Env      | CD8     | 2.48     | 0.39         | 0.46 | 1.58 |      | 1.17 |              |          |              | 0.28 | 0.93 | 0.82 | 1.03 | 1.36         |
| LK45    | Env      | CD4     |          |              |      |      |      | 3.36 |              |          |              |      |      |      |      |              |
| LK54    | Env      | CD4     |          | 1.79         | 0.23 | 0.64 |      |      |              |          | 0.19         |      |      | 0.26 |      |              |
| LK56    | Env      | CD4     | 0.31     | 0.10         | 0.77 | 0.46 | 0.77 | 5.43 | 1.82         |          |              |      | 0.13 |      |      |              |
| LK59    | Env      | CD4     |          |              |      |      |      |      |              |          |              |      |      |      |      | 0.11         |
| LK60    | Env      | CD4     |          |              |      | 0.39 |      | 0.61 |              |          |              |      |      |      |      |              |
| LK45    | Env      | CD8     |          |              |      |      |      |      |              |          |              |      | 3.12 |      |      |              |
| LK54    | Env      | CD8     | 0.64     | 0.64         | 0.21 |      | 0.37 |      |              |          | 0.29         |      | 0.71 | 0.22 | 0.29 | 0.16         |
| LK56    | Env      | CD8     | 1.48     | 1.21         | 1.21 | 0.93 | 1.15 | 8.00 | 2.29         | 0.54     | 0.22         |      | 1.69 |      | 0.07 |              |
| LK59    | Env      | CD8     |          |              |      |      | 1.49 |      |              |          | 0.14         | 0.09 | 1.34 |      | 0.14 |              |
| LK60    | Env      | CD8     |          |              | 0.18 | 0.17 |      |      |              |          |              |      |      |      |      |              |

#Peptide specific responses are shown as percentage for CD3+CD4+ and CD3+CD8+ T cell subsets. Although both Gag and Env peptides pools were tested, only positive responses are shown.

**Table S5: SIV-antigen specific cytokine responses in PBMC during pV#3 and pV#4 vaccination phase**

| Macaque | Antigen# | T cells | pV#3     |              |      |      |      |      |              | pV#4     |              |      |      |      |      |              |
|---------|----------|---------|----------|--------------|------|------|------|------|--------------|----------|--------------|------|------|------|------|--------------|
|         |          |         | CD107a/b | IFN $\gamma$ | IL2  | IL4  | IL5  | IL21 | TNF $\alpha$ | CD107a/b | IFN $\gamma$ | IL2  | IL4  | IL5  | IL21 | TNF $\alpha$ |
| LK50    | Gag      | CD4     |          |              |      |      |      |      |              | 0.34     |              |      |      |      | 0.23 |              |
| LK57    | Gag      | CD4     |          |              |      |      |      |      |              | 0.54     |              |      | 3.73 |      |      |              |
| LK58    | Gag      | CD4     | 0.34     | 0.16         |      | 2.63 |      | 0.96 | 0.21         | 0.58     |              |      |      |      |      |              |
| LK50    | Gag      | CD8     |          |              |      |      |      |      |              |          |              |      |      |      |      |              |
| LK57    | Gag      | CD8     |          |              |      | 0.24 |      |      |              |          |              |      | 4.74 |      |      |              |
| LK58    | Gag      | CD8     | 2.57     | 0.23         |      | 0.15 | 0.15 | 0.89 | 1.21         | 0.90     |              |      |      |      |      |              |
| LK45    | Gag      | CD4     |          | 0.08         |      |      |      |      | 0.05         |          |              |      | 1.72 |      |      |              |
| LK54    | Gag      | CD4     |          |              |      | 2.69 |      | 1.16 | 0.08         | 0.61     |              |      |      |      |      |              |
| LK56    | Gag      | CD4     |          |              |      | 0.12 |      |      |              | 0.10     |              |      |      |      |      |              |
| LK59    | Gag      | CD4     |          |              |      |      |      |      |              |          | 0.08         | 0.06 | 1.43 |      |      | 0.05         |
| LK60    | Gag      | CD4     |          |              |      |      |      |      |              | 0.35     |              |      |      |      | 0.14 | 0.23         |
| LK45    | Gag      | CD8     |          |              |      |      |      | 1.62 |              |          |              |      | 3.62 |      |      |              |
| LK54    | Gag      | CD8     |          |              |      | 0.19 |      | 0.98 | 0.37         | 0.39     |              |      |      | 0.05 |      |              |
| LK56    | Gag      | CD8     |          |              |      |      |      |      |              |          |              |      |      |      |      |              |
| LK59    | Gag      | CD8     |          |              |      |      | 0.25 |      |              |          |              |      | 3.78 | 0.36 |      |              |
| LK60    | Gag      | CD8     |          |              |      |      |      |      |              | 0.14     |              |      |      |      |      |              |
| LK50    | Env      | CD4     |          |              |      |      |      |      |              | 0.33     |              |      |      |      |      |              |
| LK57    | Env      | CD4     |          |              |      |      |      |      |              | 0.23     |              |      | 1.98 |      |      |              |
| LK58    | Env      | CD4     | 0.64     |              |      |      |      | 2.44 | 0.20         | 1.46     |              |      |      |      |      |              |
| LK50    | Env      | CD8     |          |              |      |      |      |      |              |          |              |      |      |      |      |              |
| LK57    | Env      | CD8     |          |              |      |      |      |      |              |          |              |      | 4.39 |      |      |              |
| LK58    | Env      | CD8     |          |              |      | 0.17 | 0.09 | 1.58 | 0.84         | 1.28     |              |      |      |      |      |              |
| LK45    | Env      | CD4     |          | 0.27         | 0.08 | 0.13 |      |      |              | 0.16     |              |      | 0.95 |      | 0.08 |              |
| LK54    | Env      | CD4     |          |              |      |      |      |      |              | 1.82     |              |      |      | 0.13 | 0.27 |              |
| LK56    | Env      | CD4     |          | 0.24         | 0.07 | 0.26 | 0.33 | 1.97 |              |          |              |      |      |      |      |              |
| LK59    | Env      | CD4     |          |              |      |      |      |      |              |          |              |      | 1.3  |      |      |              |
| LK60    | Env      | CD4     |          |              |      |      |      |      |              | 2.34     |              |      |      |      | 0.96 | 0.81         |
| LK45    | Env      | CD8     |          |              | 0.21 |      | 0.66 |      |              |          |              |      | 2.93 |      | 0.26 |              |
| LK54    | Env      | CD8     |          | 0.07         | 0.13 | 0.16 |      | 1.50 | 0.24         | 3.00     |              |      |      | 0.11 | 0.81 |              |
| LK56    | Env      | CD8     |          | 0.11         |      |      | 0.34 | 2.08 | 1.27         |          |              |      |      |      | 0.05 |              |
| LK59    | Env      | CD8     |          |              |      |      |      |      |              |          |              |      | 4.35 |      | 0.08 |              |
| LK60    | Env      | CD8     |          |              |      |      |      |      |              | 1.04     |              |      |      |      |      |              |

#Peptide specific responses are shown as percentage for CD3+CD4+ and CD3+CD8+ T cell subsets. Although both Gag and Env peptides pools were tested, only positive responses are shown.
