# Supplementary material for: Recombinant Simian Varicella Virus-Simian Immunodeficiency Virus Vaccine Induces T and B Cell Functions and Provides Partial Protection against Repeated Mucosal SIV Challenges in Rhesus Macaques
Source: MDPI journal article supplement (doi:10.3390/v14122819), 2022-12-17
Supplement: s1 [file s1]

Figure S1

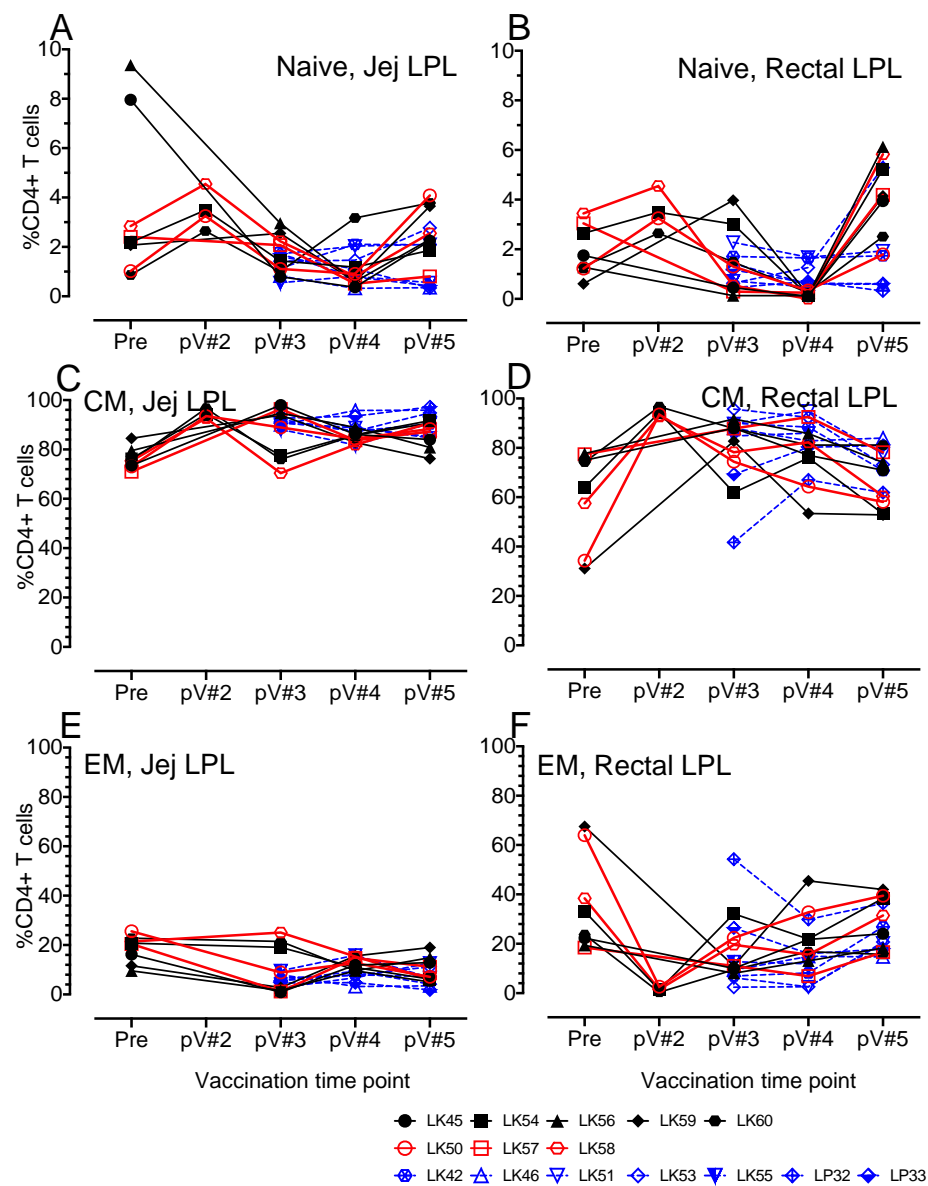

Figure S2

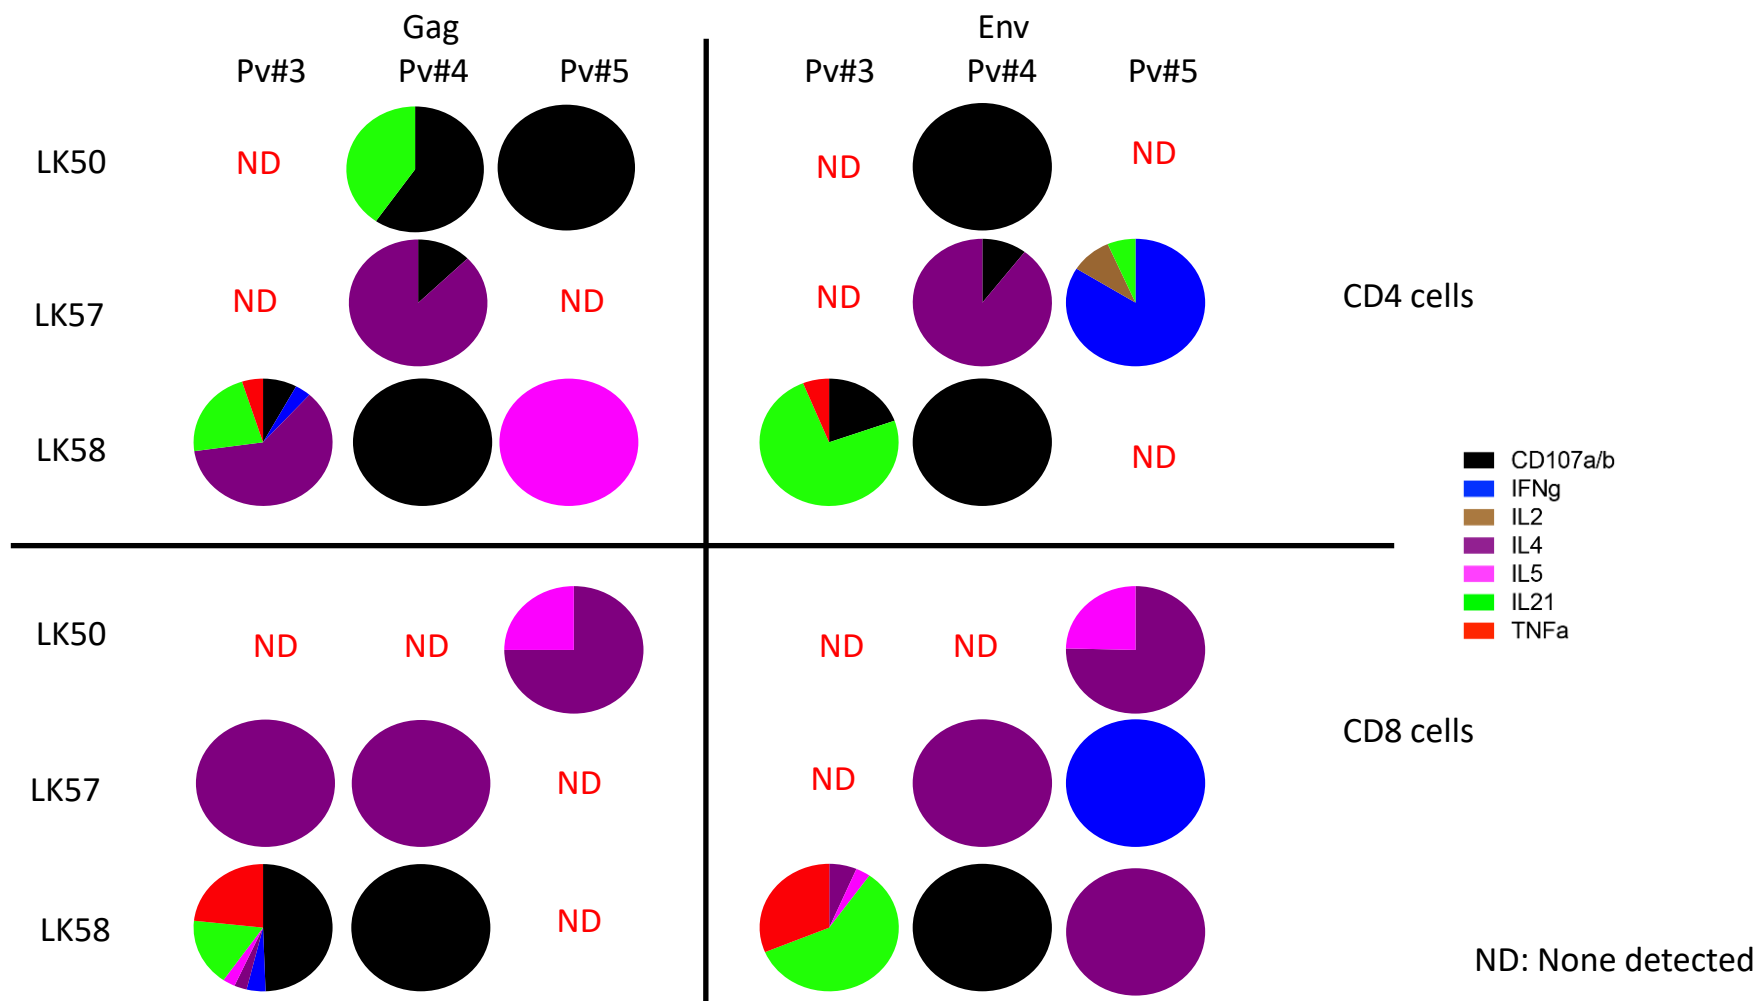

Figure S3

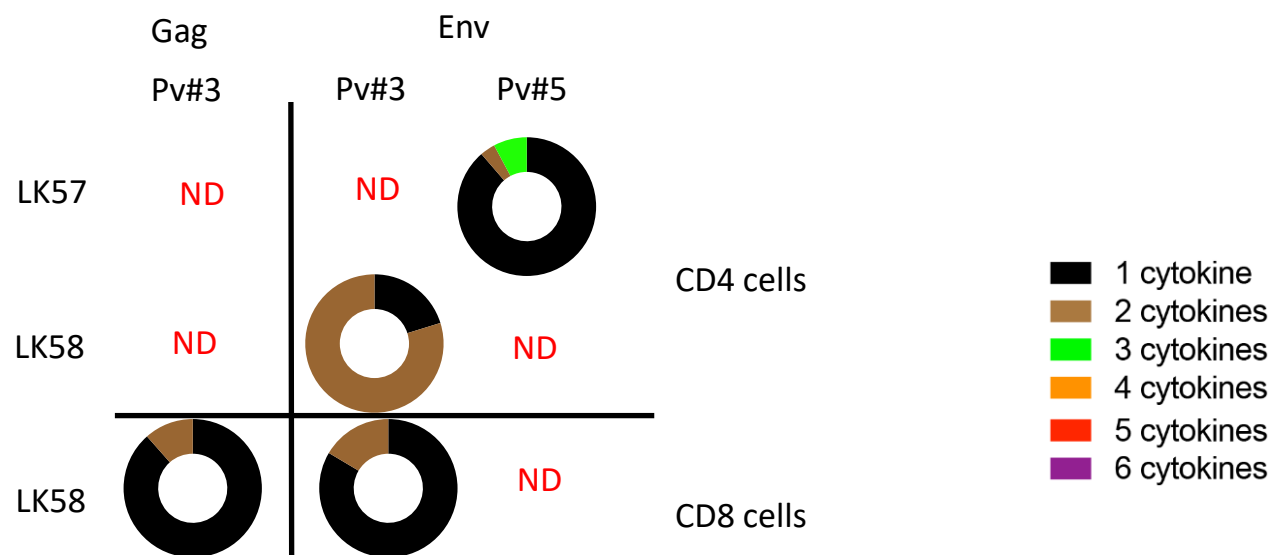

ND: None detected

Figure S4

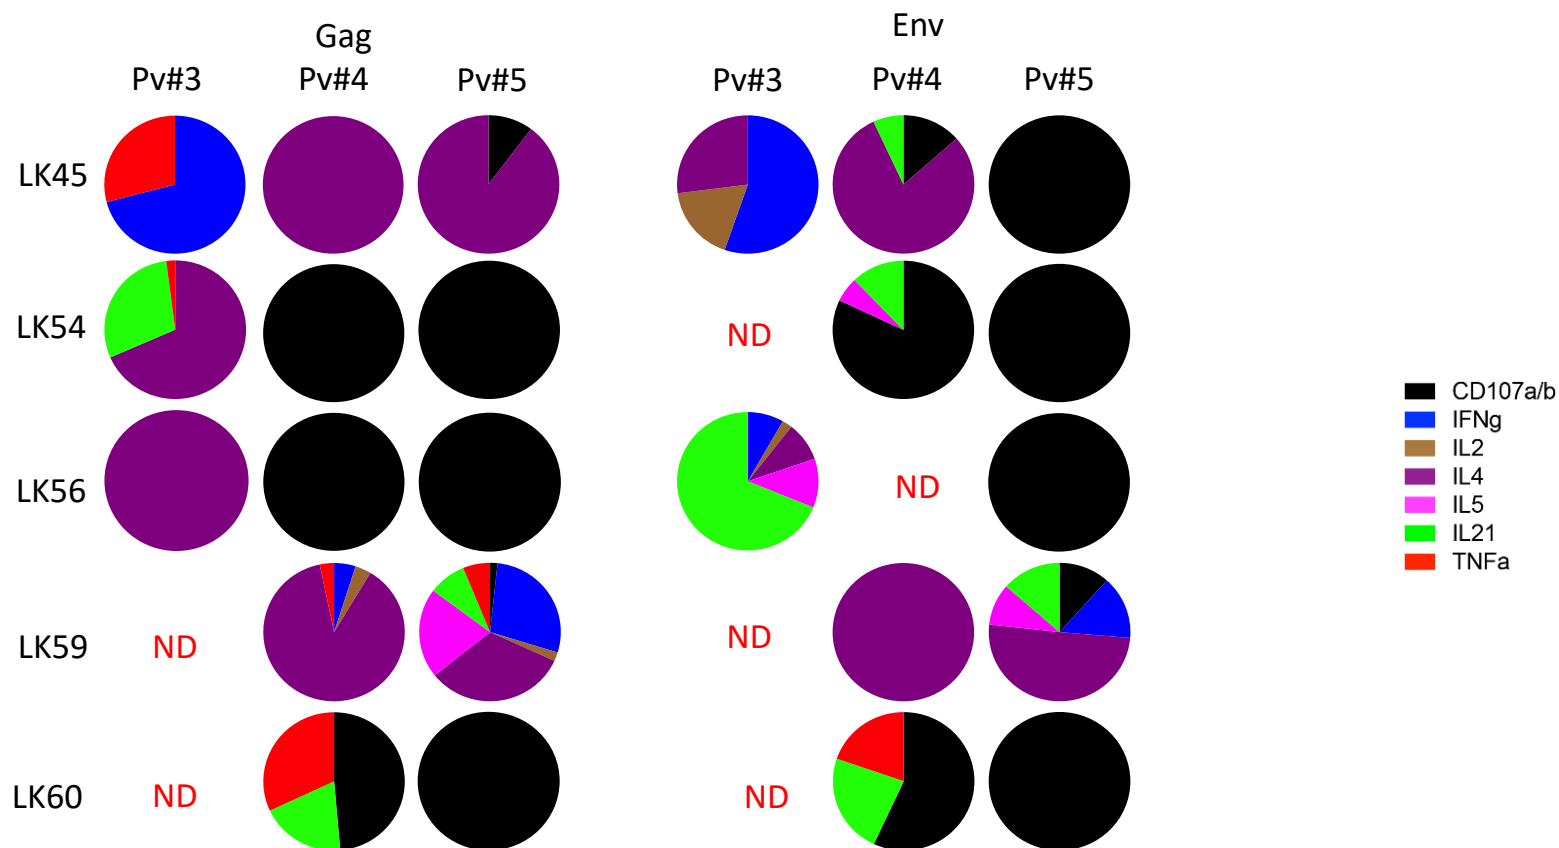

ND: None detected

Figure S5

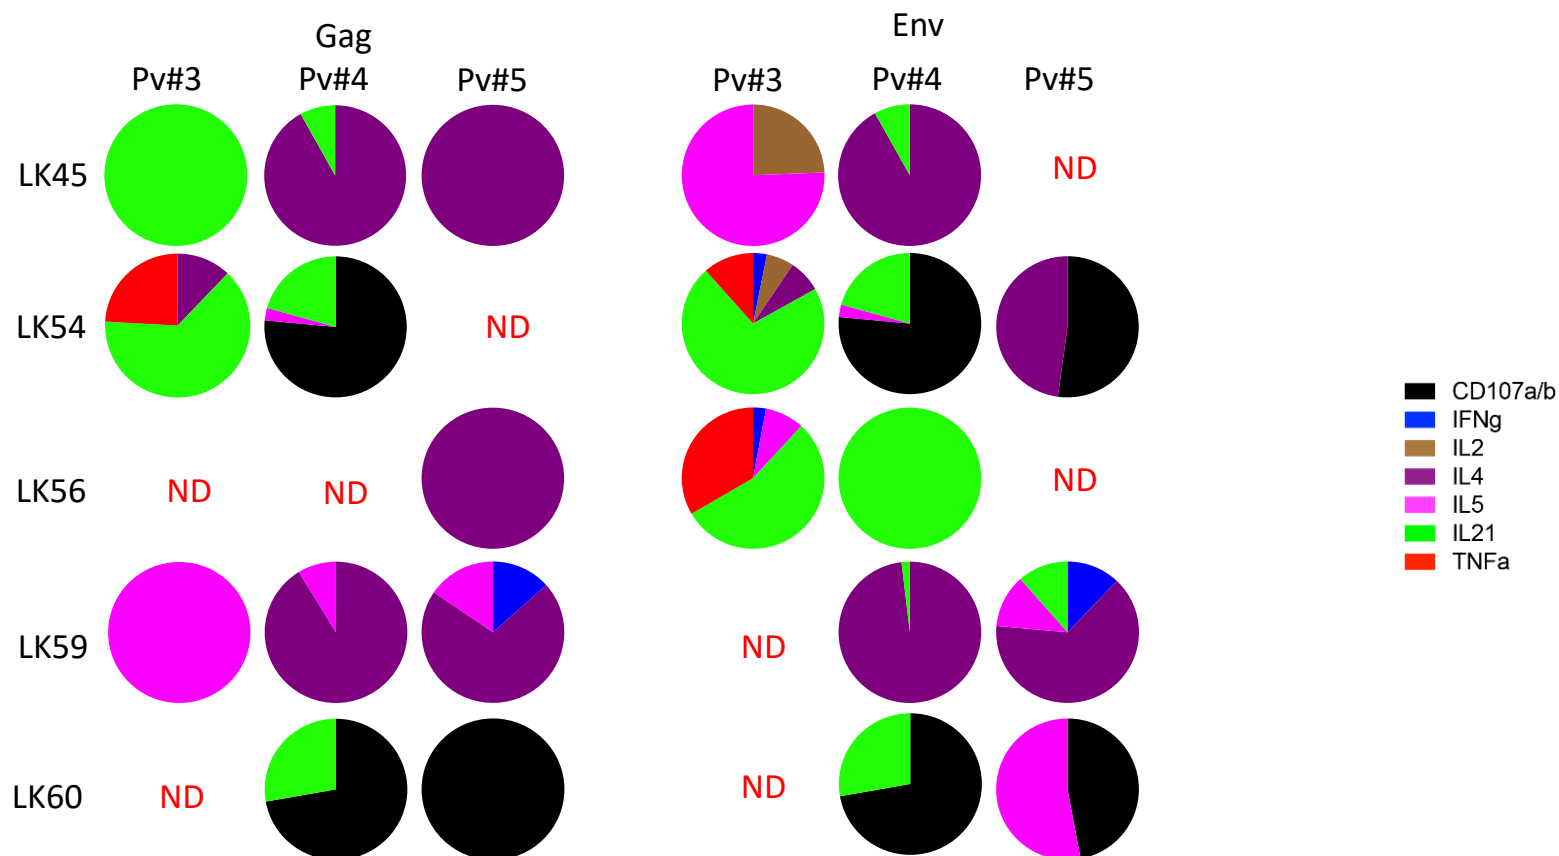

ND: None detected

Figure S6

### Polyfunctionality in CD4+ T cell in PBMC

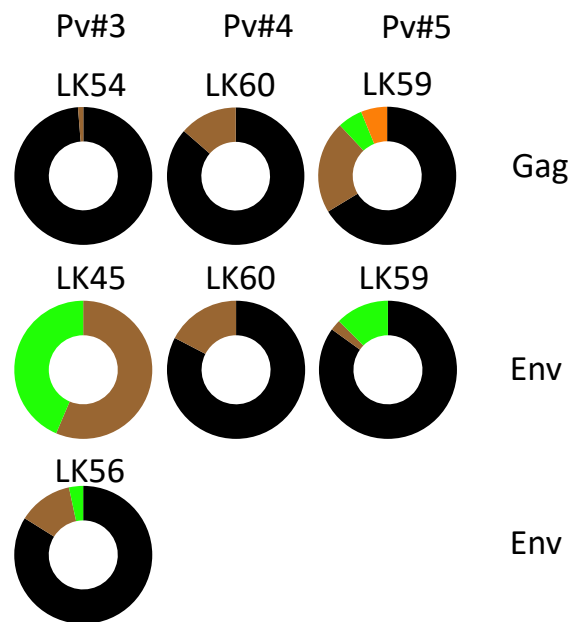

### Polyfunctionality in CD8+ T cell in PBMC

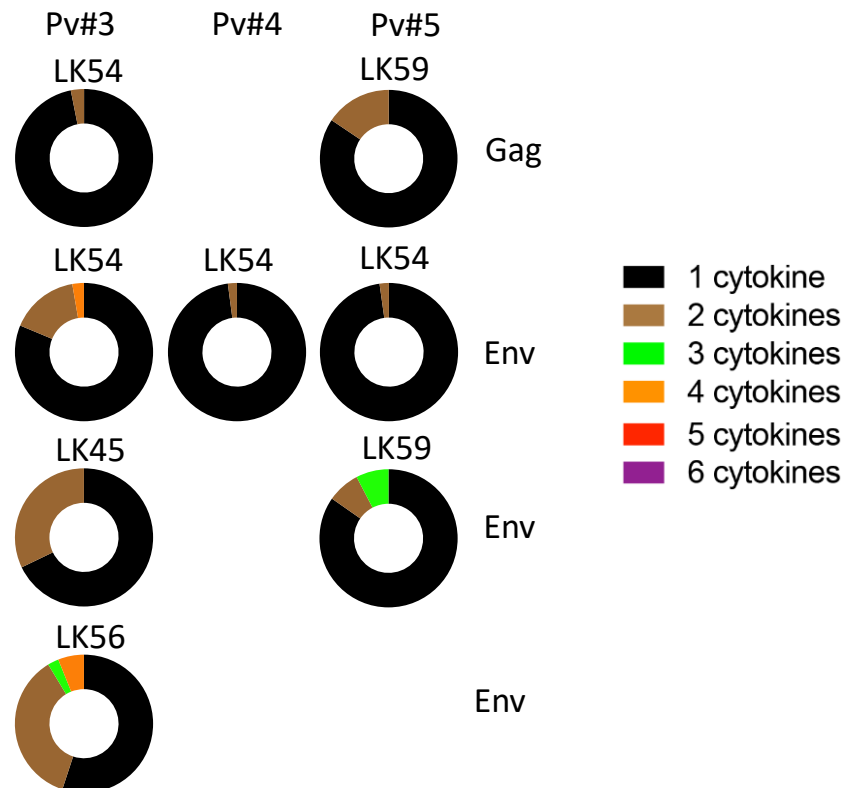

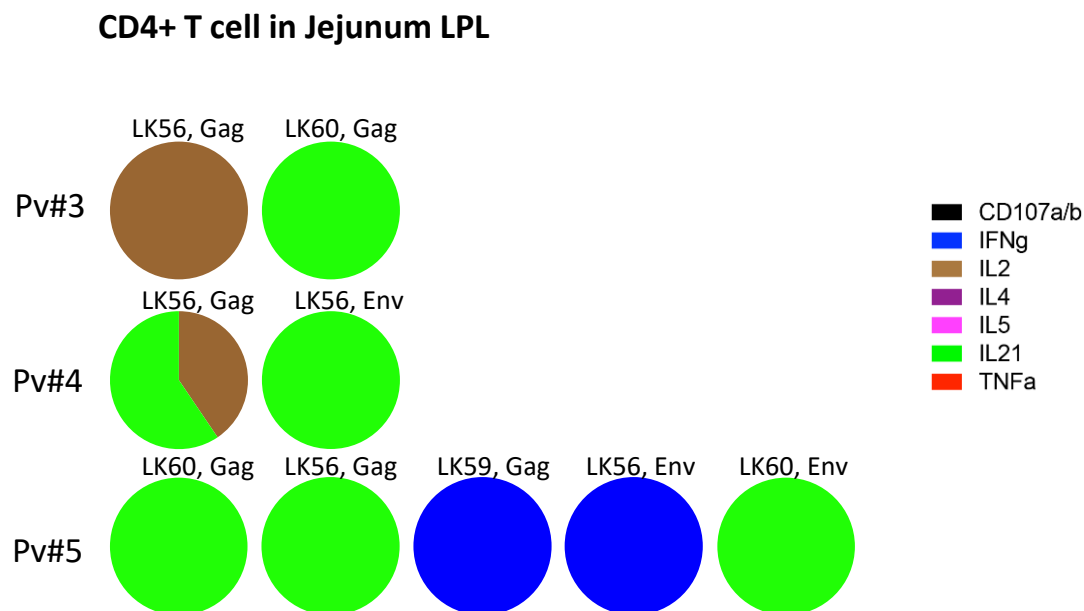

**Note: Assays performed for the following jejunum LPL samples and antigen**

PV#3: LK50 (Gag), LK54 (Gag), LK58 (Gag), LK60 (Gag), LK45 (Gag), LK56 (Gag), LK57 (Gag), LK53 (Gag), LK55 (Gag)

PV#4: LK56 (Gag & Env), LK57 (Env), LK58 (Gag & Env), LK59 (Gag)

PV#5: LK46 (Gag), LK45 (Gag), LK56 (Gag & Env), LK57 (Gag), LK59 (Gag), LK60 (Gag & Env), LP32 (Gag)

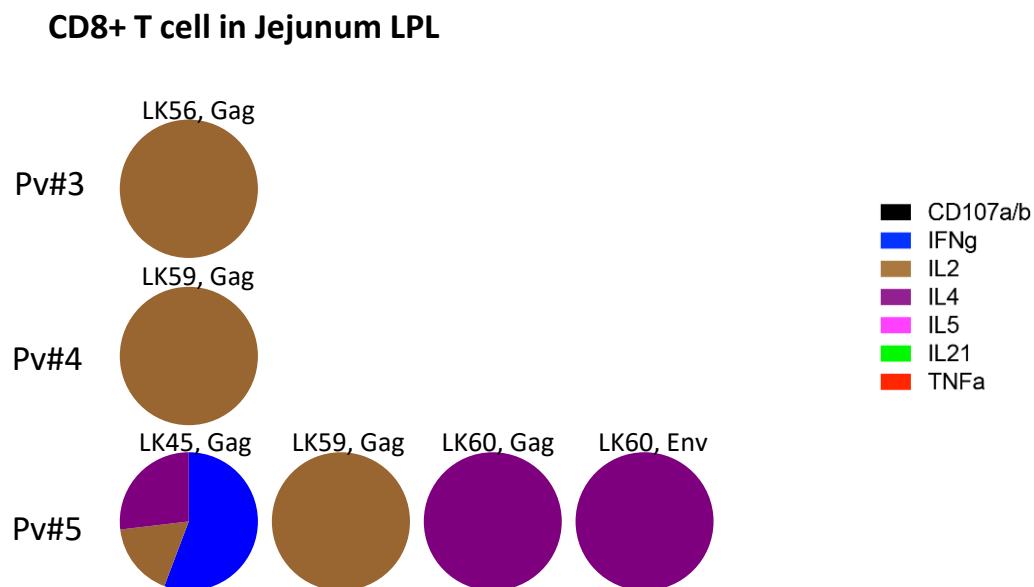

**Note: Assays performed for the following jejunum LPL samples and antigen**

PV#3: LK50 (Gag), LK54 (Gag), LK58 (Gag), LK60 (Gag), LK45 (Gag), LK56 (Gag), LK57 (Gag), LK53 (Gag), LK55 (Gag)

PV#4: LK56 (Gag & Env), LK57 (Env), LK58 (Gag & Env), LK59 (Gag)

PV#5: LK46 (Gag), LK45 (Gag), LK56 (Gag & Env), LK57 (Gag), LK59 (Gag), LK60 (Gag & Env), LP32 (Gag)
